# Supplementary material
Source: MDPI journal article supplement (https://www.mdpi.com/2072-4292/14/8/1935)
Supplement: s1 [file s1]

# Article

# Evaluation and Comparison of MODIS C6 and C6.1 Deep Blue Aerosol Products in Arid and Semi-Arid Areas of Northwestern China

Leiku Yang <sup>1,\*</sup>, Xinyao Tian <sup>1</sup>, Chao Liu <sup>2</sup>, Weiqian Ji <sup>1</sup>, Yu Zheng <sup>3</sup>, Huan Liu <sup>1</sup>, Xiaofeng Lu <sup>1</sup> and Huizheng Che <sup>3</sup>

<sup>1</sup> School of Surveying and Land Information Engineering, Henan Polytechnic University, Jiaozuo 454003, China; 211904020024@home.hpu.edu.cn (X.T.); 112104010008@home.hpu.edu.cn (W.J.); 211904020036@home.hpu.edu.cn (H.L.); lxf@hpu.edu.cn (X.L.)

<sup>2</sup> Shanghai Surveying and Mapping Institute, Shanghai 200063, China; 212004010015@home.hpu.edu.cn

<sup>3</sup> State Key Laboratory of Severe Weather (LASW), Institute of Atmospheric Composition, Chinese Academy of Meteorological Sciences, Beijing 100081, China; yuzheng@cma.gov.cn (Y.Z.); chehz@cma.gov.cn (H.C.)

\* Correspondence: yanglk@hpu.edu.cn

**Citation:** Yang, L.; Tian, X.; Liu, C.; Ji, W.; Zheng, Y.; Liu, H.; Lu, X.; Che, H. Evaluation and Comparison of MODIS C6 and C6.1 Deep Blue Aerosol Products in Arid and Semi-Arid Areas of Northwestern China. *Remote Sens.* **2022**, *14*, 1935. <https://doi.org/10.3390/rs14081935>

Academic Editors: Carmine Serio and Falguni Patadia

Received: 24 February 2022

Accepted: 14 April 2022

Published: 17 April 2022

**Publisher's Note:** MDPI stays neutral with regard to jurisdictional claims in published maps and institutional affiliations.

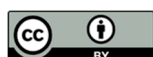

**Copyright:** © 2022 by the authors. Licensee MDPI, Basel, Switzerland. This article is an open access article distributed under the terms and conditions of the Creative Commons Attribution (CC BY) license (<https://creativecommons.org/licenses/by/4.0/>).

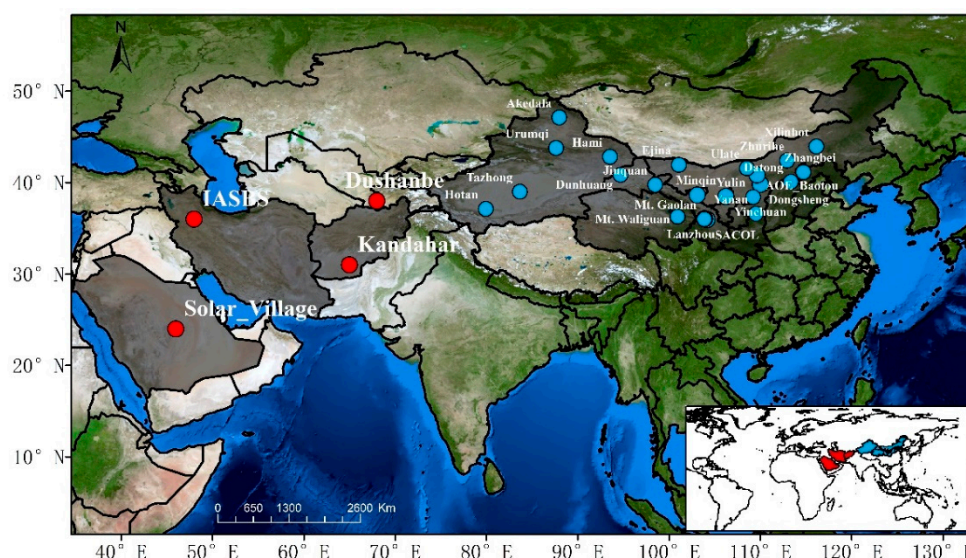

**Figure S1.** The geolocation of four AERONET sites in Middle East and Central Asia.



**Table S1.** Statistics results for validation of MODIS Aqua C6 and C6.1 Deep Blue AOD products over Northwestern China.

|              | <b>N(C6/C6.1)</b> | <b>R(C6/C6.1)</b> | <b>EE%(C6/C6.1)</b> | <b>RMSE(C6/C6.1)</b> | <b>RMB(C6/C6.1)</b> |
|--------------|-------------------|-------------------|---------------------|----------------------|---------------------|
| Akedala      | 254/372           | 0.713/0.317       | 19.29/71.24         | 0.155/0.081          | 0.134/−0.031        |
| Mt. Waliguan | 40/34             | 0.816/0.799       | 75.00/64.71         | 0.122/0.142          | −0.028/−0.012       |
| Dongsheng    | 39/31             | 0.930/0.953       | 33.33/29.03         | 0.154/0.163          | −0.115/−0.132       |
| Yulin        | 176/168           | 0.457/0.610       | 24.43/24.40         | 0.249/0.249          | −0.179/−0.197       |
| Yanan        | 90/94             | 0.882/0.889       | 23.33/20.21         | 0.182/0.186          | −0.145/−0.15        |
| SACOL        | 539/597           | 0.866/0.851       | 35.99/75.04         | 0.176/0.123          | −0.13/−0.004        |
| Mt. Gaolan   | 361/392           | 0.792/0.750       | 23.55/48.98         | 0.225/0.179          | −0.187/−0.107       |
| Tazhong      | 1138/1150         | 0.881/0.884       | 16.52/17.30         | 0.315/0.308          | −0.256/−0.25        |
| Hotan        | 379/383           | 0.823/0.827       | 4.22/4.70           | 0.406/0.398          | −0.342/−0.337       |
| Minqin       | 656/639           | 0.780/0.793       | 42.99/43.19         | 0.188/0.185          | −0.116/−0.12        |
| Hami         | 374/386           | 0.792/0.786       | 60.43/60.10         | 0.102/0.100          | −0.068/−0.065       |
| Jiuquan      | 197/185           | 0.872/0.916       | 55.33/48.11         | 0.123/0.130          | −0.092/−0.1         |
| Zhangbei     | 53/48             | 0.757/0.770       | 9.43/6.25           | 0.232/0.247          | −0.213/−0.229       |
| Dunhuang     | 1167/1189         | 0.857/0.856       | 45.93/41.46         | 0.175/0.181          | −0.11/−0.12         |
| Xilinhote    | 655/601           | 0.845/0.835       | 55.27/48.75         | 0.122/0.125          | −0.087/−0.096       |
| AOE_Baotou   | 56/55             | 0.806/0.797       | 82.14/78.18         | 0.079/0.089          | −0.044/−0.055       |
| Zhurihe      | 149/146           | 0.743/0.812       | 51.68/54.79         | 0.147/0.126          | −0.028/−0.038       |
| Ulate        | 115/97            | 0.651/0.766       | 54.78/61.86         | 0.133/0.122          | −0.034/−0.061       |
| Ejina        | 1296/1268         | 0.799/0.841       | 76.39/80.76         | 0.097/0.087          | −0.029/−0.032       |
| Urumqi       | 813/514           | 0.419/0.657       | 39.24/44.75         | 0.201/0.175          | −0.139/−0.124       |
| Datong       | 937/768           | 0.705/0.738       | 32.55/22.01         | 0.253/0.280          | −0.187/−0.226       |
| Yinchuan     | 140/100           | 0.685/0.890       | 32.14/9.00          | 0.225/0.278          | −0.143/−0.253       |
| Lanzhou      | 1002/1085         | 0.651/0.723       | 3.99/15.39          | 0.439/0.350          | −0.394/−0.3         |
